# Supplementary material for: A Multicenter, Open-Label, Controlled Phase II Study to Evaluate Safety and Immunogenicity of MVA Smallpox Vaccine (IMVAMUNE) in 18–40 Year Old Subjects with Diagnosed Atopic Dermatitis
Source: PubMed Central journal article supplement (PMC4595076; doi:10.1371/journal.pone.0138348), 2015-10-06
Supplement: pone.0138348.s008.pdf [file pone.0138348.s008.pdf]

**List of IECs / IRBs**

| <b>Site No.</b> | <b>Principal Investigator</b> | <b>IEC / IRB – Site</b>                                                                                                                              | <b>IEC/IRB Address</b>                                                                              | <b>Country</b> |
|-----------------|-------------------------------|------------------------------------------------------------------------------------------------------------------------------------------------------|-----------------------------------------------------------------------------------------------------|----------------|
| 001             | Galan Herrera, Juan F         | Comité de Inv. para Estudios en Humanos                                                                                                              | Puente de Piedra No.150, Col. Toriello Guerra, Tlalpan Mexico City, Mexico 14050                    | MEXICO         |
| 002             | Barba Gomez, Jose F           | Comité de Ética del Instituto Dermatológico de Jalisco                                                                                               | Avenida Federalismo Norte 3120 Col. Atemajac del Valle Zapopan, Jalisco, Mexico 45190               | MEXICO         |
| 003             | Hernandez Garcia, Araceli     | Comité de Ética de la Unidad de Investigación en Salud de Chihuahua                                                                                  | Ortiz Mena 2200, Fracc. Las Palmas, Chihuahua, Chih. Chihuahua 31205                                | MEXICO         |
| 004             | Gomez Vera, Javier            | Comde Inv y Bioética del Hosp Adolfo López M                                                                                                         | Av. Universidad No. 1321, Col. Florida Mexico City, Mexico City 01030                               | MEXICO         |
| 005             | Gonzalez Diaz, Sandra N       | Comité de Investigación y Ética de la Facultad de Medicina y Hospital Universitario "Dr. José Eleuterio González" Universidad Autónoma de Nuevo León | Av. Francisco I. Madero Pte s/n y Av.Gonzalitos s/n. Col. Mitras Centro Monterrey, Nuevo León 64460 | MEXICO         |
| 013             | Rojo Gutierrez, Maria I       | Comité de Ética en Investigación del Hospital Juárez de México                                                                                       | Av. Instituto Politécnico Nacional #5160, Col. Magdalena de las Salinas, Mexico DF, CP 07760        | MEXICO         |
| 015             | Mata Lara, Maria G            | Comité de Ética del Hospital "Doctor Ángel Leño"                                                                                                     | Av. Dr. Ángel Leño #500 Esq. Av. Juan Gil, Col. Los Robles, Zapopan, Jalisco, CP 45200              | MEXICO         |
| 008             | Greenberg, Richard N          | University of                                                                                                                                        | 315 Kinkead Hall,                                                                                   | USA            |

|     |                                   |                               |                                                                         |     |
|-----|-----------------------------------|-------------------------------|-------------------------------------------------------------------------|-----|
|     |                                   | Kentucky                      | University of Kentucky;<br>Lexington, KY 40506                          |     |
| 009 | Rich, Phoebe                      | IntegReview IRB               | 3001 S. Lamar Blvd.,<br>Suite 210<br>Austin, TX 78704                   | USA |
| 011 | Mraz, Serena M                    | IntegReview IRB               | 3001 S. Lamar Blvd.,<br>Suite 210<br>Austin, TX 78704                   | USA |
| 012 | Lundell, Stefanie                 | IntegReview IRB               | 3001 S. Lamar Blvd.,<br>Suite 210<br>Austin, TX 78704                   | USA |
| 017 | Davis, Steven A                   | IntegReview IRB               | 3001 S. Lamar Blvd.,<br>Suite 210<br>Austin, TX 78704                   | USA |
| 018 | Dinh, Dinh V                      | IntegReview IRB               | 3001 S. Lamar Blvd.,<br>Suite 210<br>Austin, TX 78704                   | USA |
| 020 | Hurley, Yadira                    | Saint Louis<br>University IRB | 3556 Caroline Street;<br>Caroline Bldg C110;<br>St. Louis, MO 63104     | USA |
| 021 | Laumann, Anne                     | Northwestern<br>University    | Rubloff Hall, 7th Floor;<br>750 N. Lake Shore Dr.,<br>Chicago, IL 60611 | USA |
| 022 | Tu, John H                        | IntegReview IRB               | 3001 S. Lamar Blvd.,<br>Suite 210<br>Austin, TX 78704                   | USA |
| 023 | Stough, IV, Dowling B             | IntegReview IRB               | 3001 S. Lamar Blvd.,<br>Suite 210<br>Austin, TX 78704                   | USA |
| 024 | Tschen, Eduardo H                 | IntegReview IRB               | 3001 S. Lamar Blvd.,<br>Suite 210<br>Austin, TX 78704                   | USA |
| 025 | Wadsworth, L. (Larkin)<br>Tyler T | IntegReview IRB               | 3001 S. Lamar Blvd.,<br>Suite 210<br>Austin, TX 78704                   | USA |
| 026 | Essink, Brandon J                 | IntegReview IRB               | 3001 S. Lamar Blvd.,<br>Suite 210<br>Austin, TX 78704                   | USA |
| 027 | Abramovits, William               | IntegReview IRB               | 3001 S. Lamar Blvd.,<br>Suite 210<br>Austin, TX 78704                   | USA |
| 028 | Kaplan, David L                   | IntegReview IRB               | 3001 S. Lamar Blvd.,<br>Suite 210<br>Austin, TX 78704                   | USA |
